# Supplementary material for: Charge and hydrophobicity are key features in sequence-trained machine learning models for predicting the biophysical properties of clinical-stage antibodies
Source: PeerJ journal article supplement (doi:10.7717/peerj.8199), 2019-12-18
Supplement: hebditch-warwicker-2019-S2.pdf [file hebditch-warwicker-2019-S2.pdf]

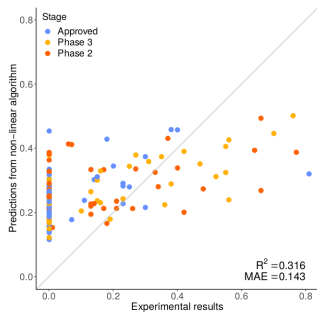

(a) PSR

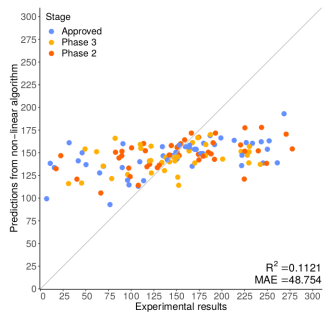

(b) HEK

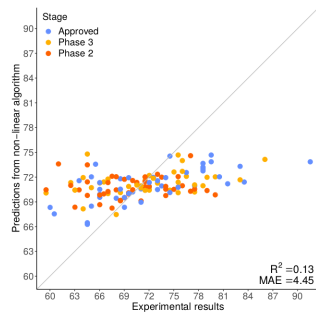

(c) DSF

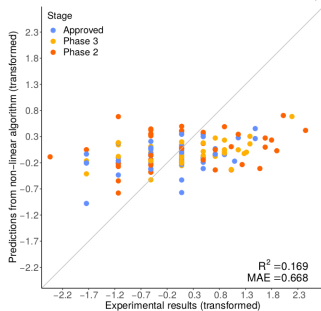

(d) CSI

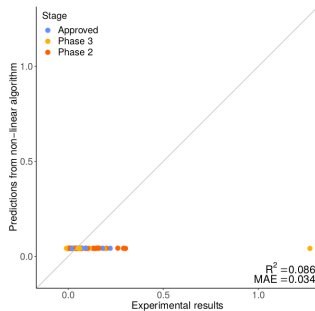

(e) ACC STAB
