# Supplementary material for: Charge and hydrophobicity are key features in sequence-trained machine learning models for predicting the biophysical properties of clinical-stage antibodies
Source: PeerJ journal article supplement (doi:10.7717/peerj.8199), 2019-12-18
Supplement: hebditch-warwicker-2019-S4.pdf [file hebditch-warwicker-2019-S4.pdf]

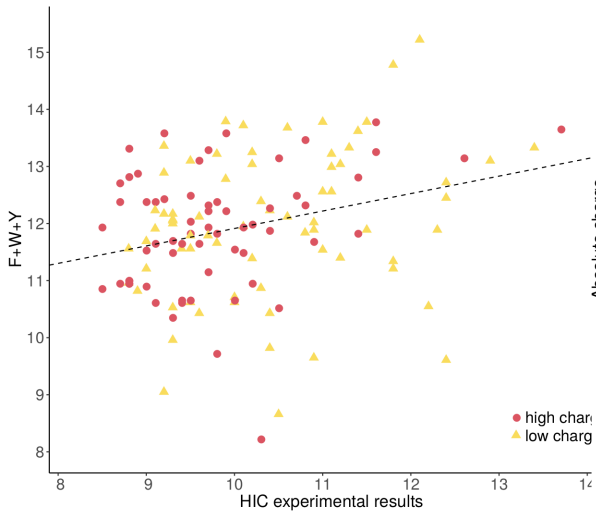

(a) Aromatic content

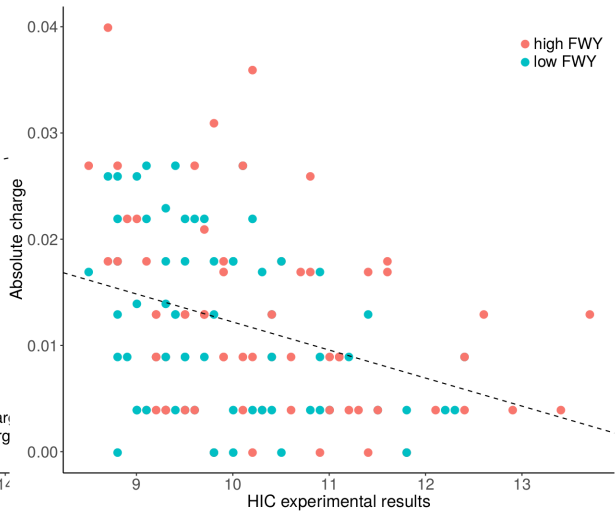

(b) Charge
